# Supplementary material for: Controllable synthesis of Pd@ZIF-L catalysts by an assembly method
Source: Royal Society of Chemistry journal article supplement (doi:10.1039/c6ra00909c), 2016-01-01
Supplement: c6ra00909c1.pdf [file c6ra00909c1.pdf]

Electronic Supplementary Information

**Controllable synthesis of Pd@ZIF-L catalysts by an assembly method**

Hong Jiang, Songlin Xue, Yefei Liu, Rizhi Chen, Weihong Xing

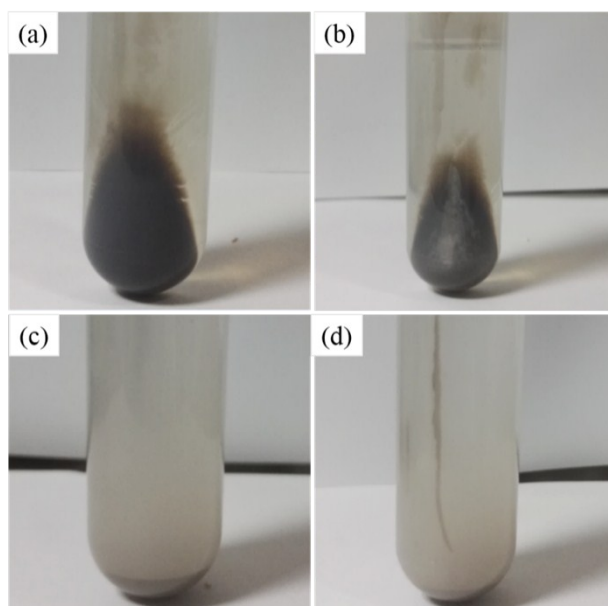

**Fig. S1** Pictures of Pd@ZIF-L catalysts synthesized under different 2-MeIM/Zn<sup>2+</sup> molar ratios:

(a) 8, (b) 15, (c) 20 and (d) 25.

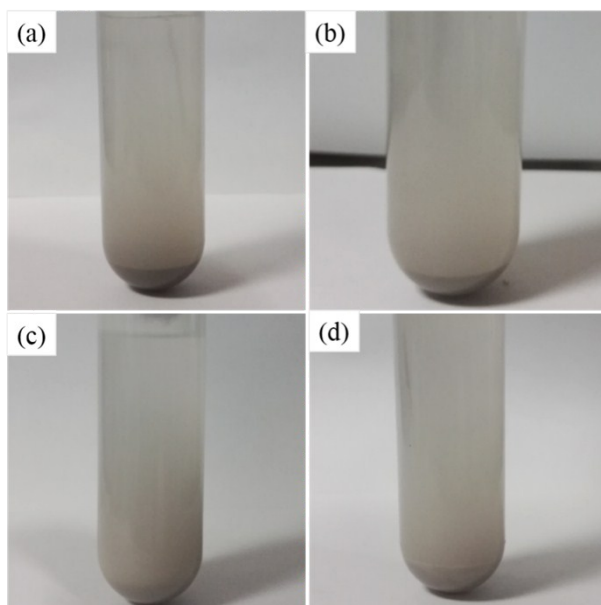

**Fig. S2** Pictures of Pd@ZIF-L catalysts synthesized under different PVP/Zn<sup>2+</sup> molar ratios:

(a) 2, (b) 4, (c) 6 and (d) 8.
